# Supplementary material for: Diurnal Changes in Active Carbon and Nitrogen Pathways Along the Temperature Gradient in Porcelana Hot Spring Microbial Mat
Source: Front Microbiol. 2018 Oct 2;9:2353. doi: 10.3389/fmicb.2018.02353 (PMC6176055; doi:10.3389/fmicb.2018.02353)
Supplement: TABLE S1 — Results of high throughput sequencing: raw reads, quality reads, percentage of reads corresponding to ribosomal RNA, non-ribosomal genes, non-redundant (NR) hits and percentage of the latter that could be taxonomically assigned. Numbers of sequences are shown in millions. [file Table_1.XLSX]

## Sheet: Table S1
Table S1. Results of high throughput sequencing: raw reads, quality reads, percentage of reads corresponding to ribosomal RNA, Non-ribosomal genes, non-redundant (NR) hits and percentage of the latter that could be taxonomically assigned. Numbers of sequences are shown in millions.
Sample	Raw Reads (millions)	High quality Reads (millions)	rRNA Reads (%)	Non-rRNA Reads (millions)	NR hits (millions)	Taxonomically-assigned (%)
66-DNA	10.5	10.4	2.2	10.2	4.5	84.5
66-cDNA Day	149.2	134.3	10.1	120.6	36.6	19.8
48-DNA	168.4	141.0	0.2	140.7	23.7	72.8
48-cDNA Day	15.5	13.4	5.7	12.7	4.7	80.7
48-cDNA Night	23.6	18.9	45.6	10.3	5.1	99.7
58-DNA	70.6	62.0	0.2	61.8	21.3	82.6
58-cDNA Day	38.5	33.6	4.5	32.1	15.2	89.4
58-cDNA Night	35.9	26.1	33.3	17.4	3.1	97.1
Total	515.2	439.7		405.8	114.2

## Sheet: Table S2
Table S2. Total percentage of Bacteria and Archaea phyla present in the entire temperature gradient of Porcelana hot spring at noon and night (N) periods.
Prokaryotes	DNA	cDNA 66	DNA	cDNA 58	cDNA 58N	DNA	cDNA	cDNA 48N
	66		58			48	48
Bacteria	98.4	94.6	99.9	99.8	99.4	99.9	99.8	99.8
Archaea	1.64	5.44	0.064	0.169	0.612	0.055	0.237	0.182
Bacterial Phyla	DNA	cDNA 66	DNA	cDNA 58	cDNA 58N	DNA 48	cDNA	cDNA 48N
	66		58				48
Chloroflexi	51.6	87.6	44.9	42.3	21.3	14.1	1.82	6.10
Cyanobacteria	28.6	1.85	37.1	52.8	29.3	39.1	88.6	32.4
Deinococcus-Thermus	5.51	0.741	9.29	0.074	0.557	3.40	0.039	0.009
Proteobacteria	4.69	3.51	5.18	2.90	39.5	30.6	2.88	52.1
Bacteroidetes	2.68	2.90	1.12	0.699	5933	2.63	3.36	3.31
Chlorobi	1.96	0.176	0.067	0.218	0.863	0.377	0.858	1642
Acidobacteria	0.955	0.210	0.269	0.270	0.510	0.925	0.167	0.672
Thermotogae	0.800	0.166	0.019	0.005	0.002	0.598	0.784	0.004
Firmicutes	0.780	0.563	0.006	0.001	0.967	0.024	0.004	1639
Planctomycetes	0.680	1159	0.322	0.467	0.395	1576	0.639	0.692
Actinobacteria	0.568	0.577	1047	0.095	0.323	1806	0.292	0.904
Spirochaetes	0.300	0.048	0.293	0.073	0.376	1332	0.104	0.271
Nitrospirae	0.389	0.226	0.034	0.076	0.000	0.712	0.271	0.093
Verrucomicrobia	0.163	0.175	0.021	0.009	0.000	0.352	0.023	0.125
Armatimonadetes	0.101	0.048	0.083	NF	0.013	1536	0.095	0.062
Deferribacteres	0.087	0.002	0.125	0.013	0.000	0.679	0.022	NF
Thermodesulfobacteria	0.055	0.007	0.002	0.000	0.001	0.007	NF	NF
Gemmatimonadetes	0.030	0.016	0.004	0.001	0.003	0.008	0.001	0.001
Chlamydiae	0.025	0.001	0.012	0.003	NF	0.122	0.003	0.004
Aquificae	0.013	0.008	0.002	NF	0.004	0.016	0.003	0.006
Marinimicrobia	0.012	0.003	0.006	0.004	0.002	0.026	0.004	0.002
Synergistetes	0.012	0.012	0.011	0.002	0.001	0.014	0.002	NF
Fusobacteria	0.004	0.002	0.005	0.001	0.002	0.037	NF	0.006
Nitrospinae	0.003	0.002	0.002	0.002	NF	0.010	0.010	NF
Dictyoglomi	0.002	0.001	0.001	NF	NF	0.009	NF	NF
Caldiserica	0.002	NF	0.001	NF	NF	0.011	NF	NF
Tenericutes	0.002	NF	0.001	NF	NF	0.003	NF	NF
Lentisphaerae	0.001	NF	0.001	NF	NF	0.005	0.001	NF
Chrysiogenetes	0.001	NF	0.001	NF	NF	0.007	NF	NF
Fibrobacteres	0.001	0.001	0.001	NF	NF	0.003	NF	0.001
Elusimicrobia	NF	NF	NF	NF	NF	0.004	0.001	NF
Archaeal Phyla	DNA	cDNA 66	DNA	cDNA 58	cDNA 58N	DNA 48	cDNA	cDNA 48N
	66		58				48
Thaumarchaeota	41.2	82.7	35.4	67.7	99.7	82.0	91.5	97.2
Euryarchaeota	52.9	12.7	57.5	29.1	0.273	16.4	8.09	2.77
Crenarchaeota	4.94	4.34	5.76	2.86	NF	1.51	0.403	NF
Korarchaeota	0.525	0.123	0.514	NF	NF	0.064	NF	NF
Nanoarchaeota	0.424	0.074	0.820	0.300	NF	0.021	NF	NF
NF: Not found

## Sheet: Table S3
Table S3. Best cultured hits and best hits, in the SILVA database, of the most relevant organisms found in Porcelana mat.
Genus assigned to	Closest culture	Closest culture	Closest culture	Closest relative	Closest relative	Closest relative
metagenomic reads	accession number	Taxonomy	% similairty	Accesion number	Taxonomy	% similairty
Chloroflexus	CP000909	Bacteria;Chloroflexi;Chloroflexia;Chloroflexales;Chloroflexaceae;Chloroflexus;Chloroflexus aurantiacus J-10-fl	96.96	CP000909	Bacteria;Chloroflexi;Chloroflexia;Chloroflexales;Chloroflexaceae;Chloroflexus;Chloroflexus aurantiacus J-10-fl	96.96
Roseiflexus	CP000686	Bacteria;Chloroflexi;Chloroflexia;Chloroflexales;Roseiflexaceae;Roseiflexus;Roseiflexus sp. RS-1	98.9	CP000686	Bacteria;Chloroflexi;Chloroflexia;Chloroflexales;Roseiflexaceae;Roseiflexus;Roseiflexus sp. RS-1	98.9
Oscillochloris	ADVR01000146	Bacteria;Chloroflexi;Chloroflexia;Chloroflexales;Oscillochloridaceae;Oscillochloris;Oscillochloris trichoides DG-6	100	ADVR01000146	Bacteria;Chloroflexi;Chloroflexia;Chloroflexales;Oscillochloridaceae;Oscillochloris;Oscillochloris trichoides DG-6	100
Anaerolinea	AP012029	Bacteria;Chloroflexi;Anaerolineae;Anaerolineales;Anaerolineaceae;Anaerolinea;Anaerolinea thermophila UNI-1	97 - 100%	AP012029	Bacteria;Chloroflexi;Anaerolineae;Anaerolineales;Anaerolineaceae;Anaerolinea;Anaerolinea thermophila UNI-1	97 - 100%
Bellilinea	AB243672	Bacteria;Chloroflexi;Anaerolineae;Anaerolineales;Anaerolineaceae;Bellilinea;Bellilinea caldifistulae	93.8	FJ638606	Bacteria;Chloroflexi;Anaerolineae;Anaerolineales;Anaerolineaceae;Bellilinea;uncultured bacterium	99.9
Mastigocladus/Fischerella	AP017305	Bacteria;Cyanobacteria;Cyanobacteria;SubsectionV;FamilyI;Fischerella;Fischerella sp. NIES-3754	99.9	AF407696	Bacteria;Cyanobacteria;Cyanobacteria;SubsectionV;FamilyI;Fischerella;uncultured bacterium	99.8
Leptolyngbya	AP017367	Bacteria;Cyanobacteria;Cyanobacteria;SubsectionIII;FamilyI;Leptolyngbya;Leptolyngbya sp. O-77	96.2	KJ465952	Bacteria;Cyanobacteria;Cyanobacteria;SubsectionIII;FamilyI;Leptolyngbya;uncultured bacterium	99.7
Oscillatoria	HM636646	Bacteria;Cyanobacteria;Cyanobacteria;SubsectionIII;FamilyI;Arthronema;Oscillatoriales cyanobacterium JSC-12	96.2	HM636646	Bacteria;Cyanobacteria;Cyanobacteria;SubsectionIII;FamilyI;Arthronema;Oscillatoriales cyanobacterium JSC-12	96.2
Chlorogloeopsis	AB093489	Bacteria;Cyanobacteria;Cyanobacteria;SubsectionV;FamilyI;Chlorogloeopsis;Chlorogloeopsis fritschii PCC 6912	99.5	AB093489	Bacteria;Cyanobacteria;Cyanobacteria;SubsectionV;FamilyI;Chlorogloeopsis;Chlorogloeopsis fritschii PCC 6912	99.5
Mastigocladopsis	KC682101	Bacteria;Cyanobacteria;Cyanobacteria;SubsectionI;FamilyI;Mastigocladopsis;Scytonema arcangeli CCIBt3134	99.9
Elioraea tepidiphila	ARKI01000023	Bacteria;Proteobacteria;Alphaproteobacteria;Rhodospirillales;unclassified Rhodospirillales; Elioraea.	98.8
Bradyrhizobium	FR753089	Bacteria;Proteobacteria;Alphaproteobacteria;Rhizobiales;Bradyrhizobiaceae;Bradyrhizobium;Bradyrhizobium sp. R-46206	100	AM934723	Bacteria;Proteobacteria;Alphaproteobacteria;Rhizobiales;Bradyrhizobiaceae;Bradyrhizobium;uncultured Bradyrhizobium sp.	100
Burkholderia	KF954774	Bacteria;Proteobacteria;Betaproteobacteria;Burkholderiales;Burkholderiaceae;Cupriavidus;Cupriavidus sp. PIC4	97	KC112070	Bacteria;Proteobacteria;Betaproteobacteria;Burkholderiales;Burkholderiaceae;Burkholderia;uncultured Burkholderia sp.	99.9
Nitrosospira	AJ000345	Bacteria;Proteobacteria;Betaproteobacteria;Nitrosomonadales;Nitrosomonadaceae;Nitrosospira;Nitrosospira sp.	100	AJ000345	Bacteria;Proteobacteria;Betaproteobacteria;Nitrosomonadales;Nitrosomonadaceae;Nitrosospira;Nitrosospira sp.	100
Thermus	CP014141	Bacteria;Deinococcus-Thermus;Deinococci;Thermales;Thermaceae;Thermus;Thermus parvatiensis	99.5	KC120646	Bacteria;Deinococcus-Thermus;Deinococci;Thermales;Thermaceae;Thermus;uncultured bacterium	98.1
Meiothermus	CP005385	Bacteria;Deinococcus-Thermus;Deinococci;Thermales;Thermaceae;Meiothermus;Meiothermus ruber DSM 1279	99.1	DQ832059	Bacteria;Deinococcus-Thermus;Deinococci;Thermales;Thermaceae;Meiothermus;uncultured bacterium	97.1
Rhodothermus	CP003029	Bacteria;Bacteroidetes;Bacteroidetes Incertae Sedis;Order II;Rhodothermaceae;Rhodothermus;Rhodothermus marinus SG0.5JP17-172	96.8	EU249949	Bacteria;Bacteroidetes;Cytophagia;Order II;Rhodothermaceae;Rhodothermus;uncultured Rhodothermus sp.	99.9
Sphingobacterium	KR083015	Bacteria;Bacteroidetes;Sphingobacteriia;Sphingobacteriales;Sphingobacteriaceae;Sphingobacterium;Sphingobacterium sp. TM-2	87.3	JF203684	Bacteria;Bacteroidetes;Sphingobacteriia;Sphingobacteriales;Sphingobacteriaceae;Sphingobacterium;uncultured bacterium	100
Chlorobium	1519464	Bacteria;Chlorobi;Chlorobia;Chlorobiales;Thermochlorobacteriaceae; Candidatus Thermochlorobacteriaceae bacterium GBChlB	98.9	JPGV01000041	Bacteria;Chlorobi;Chlorobia;Chlorobiales;Chlorobiaceae;uncultured;Chlorobium sp. GBChlB	98.9
Ca. Scalindua	EF602039	Bacteria;Planctomycetes;Planctomycetacia;Brocadiales;Brocadiaceae;Candidatus Scalindua;Candidatus Scalindua marina	96.6	GQ351072	Bacteria; PVC group; Planctomycetes; Planctomycetia; Candidatus Brocadiales; Candidatus Brocadiaceae; Candidatus Scalindua; uncultured planctomycete	99.8
Ignavibacterium	CP003418	Bacteria;Ignavibacteriae;Ignavibacteria;Ignavibacteriales;Ignavibacteriaceae;Ignavibacterium;Ignavibacterium album JCM 16511	97.8	JX875909	Bacteria;Chlorobi;Ignavibacteria;Ignavibacteriales;Ignavibacteriaceae;Ignavibacterium;uncultured bacterium	99.4
Nitrososphaera	JF799625	Archaea;Thaumarchaeota;Soil Crenarchaeotic Group(SCG);Unknown Order;Unknown Family;Candidatus Nitrososphaera;Crenarchaeote enrichment culture clone OREC-B1045	97.9	KC437211	Archaea;Thaumarchaeota;Soil Crenarchaeotic Group(SCG);Unknown Order;Unknown Family;Candidatus Nitrososphaera;uncultured archaeon	100
Nitrosopumilus	KR737579	Archaea;Thaumarchaeota;Marine Group I;Unknown Order;Unknown Family;Candidatus Nitrosopumilus;Nitrosopumilus sp. DDS1	99.7	JQ224392	Archaea;Thaumarchaeota;Marine Group I;Unknown Order;Unknown Family;Candidatus Nitrosopumilus;uncultured marine archaeon	98.8

## Sheet: Table S4
Table S4. Processes and pathways analyzed with principal genes associated and encoding proteins, used as diagnostic for phototrophy, autotrophy and nitrogen cycle transformations.
Process and pathways	Genes	Encoded protein
Phototrophy
PII	psbA	D1 protein of photosystem II (PSII)
PI	psaA	P700 chlorophyll a apoprotein A1(PSI)
RC	pufM	Reaction center protein M chain
	fmoA	Bacteriochlorophyll a protein
	pscA	Photosystem P840 reaction center large subunit
	bchC	Bacteriochlorophyllide a dehydrogenase
Autotrophy (CO2 fixation)
Calvin Cycle	rbcL	Large subunit of the ribulose-bisphosphate carboxylase
3-Hydroxypropionate autotrophic pathway	mcl	Malyl-CoA/beta-methylmalyl-CoA/citramalyl-CoA lyase
	mcr	Malonyl-CoA reductase
	prpE	Propionyl-CoA synthase
Hydroxypropionate-hydroxybutyrate	atoB	Acetyl-CoA C-acetyltransferase;
	crt	Enoyl-CoA hydratase;
	abfD	4-hydroxybutyryl-CoA dehydratase;
	sucD	Succinate-semialdehyde dehydrogenase
Wood-Ljungdahl	CODH	carbon monoxide dehydrogenase
Reductive TCA	aclA, aclB	ATP-citrate lyase
	ccsA, ccsB	citryl-CoA synthetase
	ccl	citryl-CoA lyase
	frdA	fumarate reductase
	korA	2-oxoglutarate synthase
Nitrogen cycle
Nitrate reduction	narB	Ferredoxin-nitrate reductase
Nitrite reduction/DNRA	nrfA	Dissimilatory nitrite reduction
Nitrogen fixation	nifH	Nitrogenase iron protein
Ammonia oxidation	amoA	Ammonia monooxygenase subunit A
Ammonia assimilation	glnA	Glutamine synthetase
Ammonia transporter	amt	Ammonium transporter, Amt family
Denitrification	nosZ	Nitrous-oxide reductase
